# Supplementary material for: The Metabolomic Profile of Lymphoma Subtypes: A Pilot Study
Source: MDPI journal article supplement (doi:10.3390/molecules24132367), 2019-06-26
Supplement: s1 [file s1]

# The metabolomic profile of lymphoma subtypes: a pilot study

Luigi Barberini <sup>1</sup>, Antonio Noto <sup>1</sup>, Claudia Fattuoni <sup>2\*</sup>, Giannina Satta <sup>1</sup>, Mariagrazia Zucca <sup>1</sup>, Maria Giuseppina Cabras <sup>3</sup>, Ester Mura <sup>3</sup>, and Pierluigi Cocco <sup>1</sup>

- <sup>1</sup> Department of Medical Sciences and Public Health, University of Cagliari, Cagliari, Italy;  
<sup>2</sup> Department of Chemical and Geological Sciences, University of Cagliari, Cagliari, Italy;  
<sup>3</sup> Department of Hematology, A. Businco Oncology Hospital, Cagliari, Italy.  
\* Correspondence: cfattuon@unica.it; Tel.: +39-070-6754397

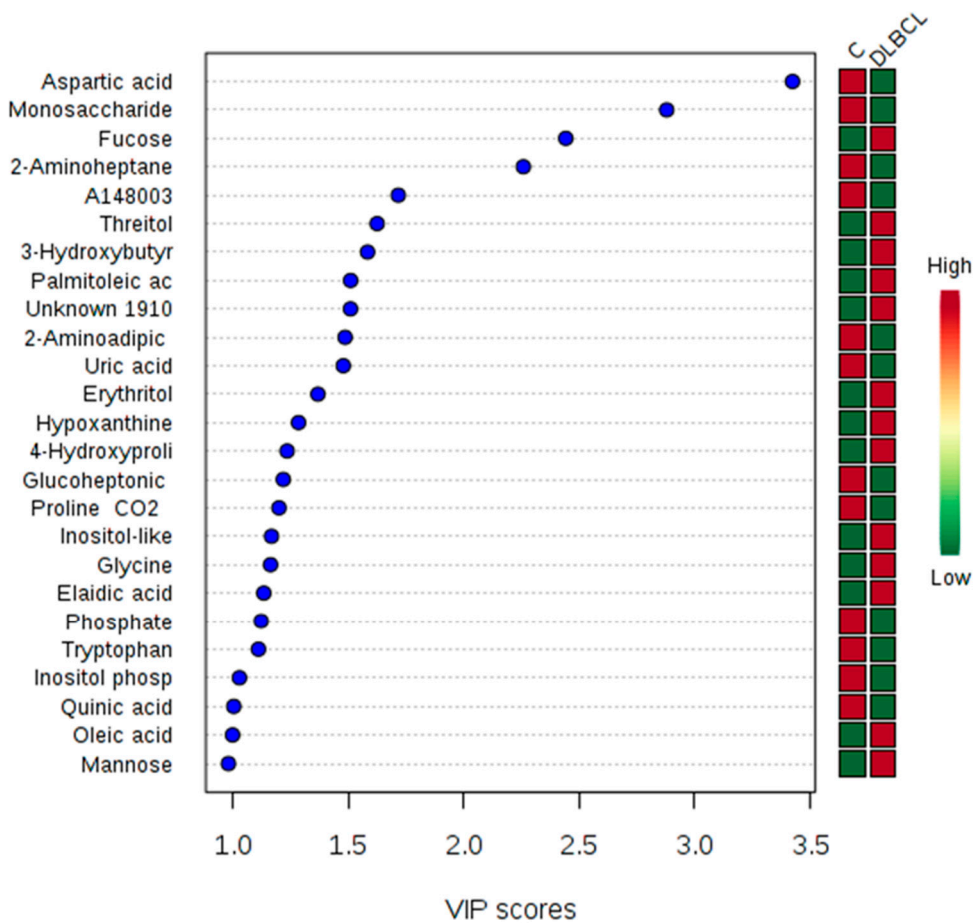

Figure S1. PLS-DA VIP score plot of the model obtained from the comparison DLBCL/Controls.

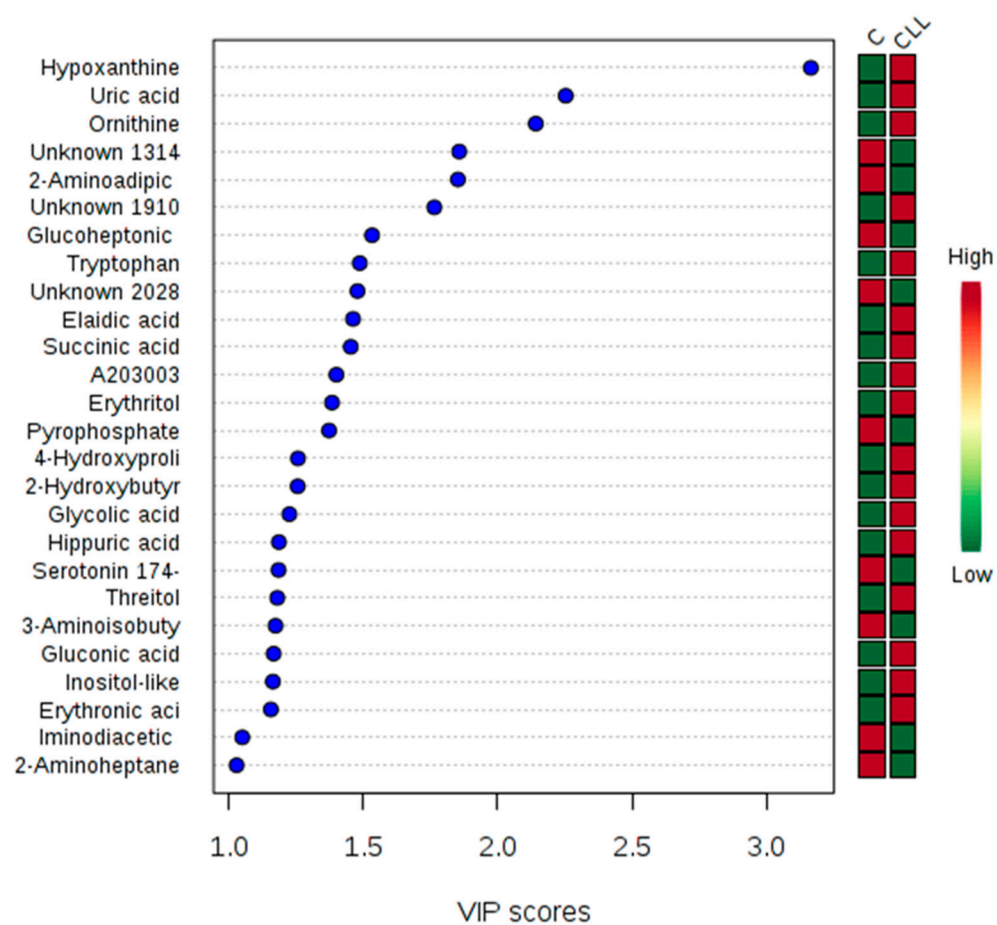

**Figure S2.** PLS-DA VIP score plot of the model obtained from the comparison CLL/Controls.

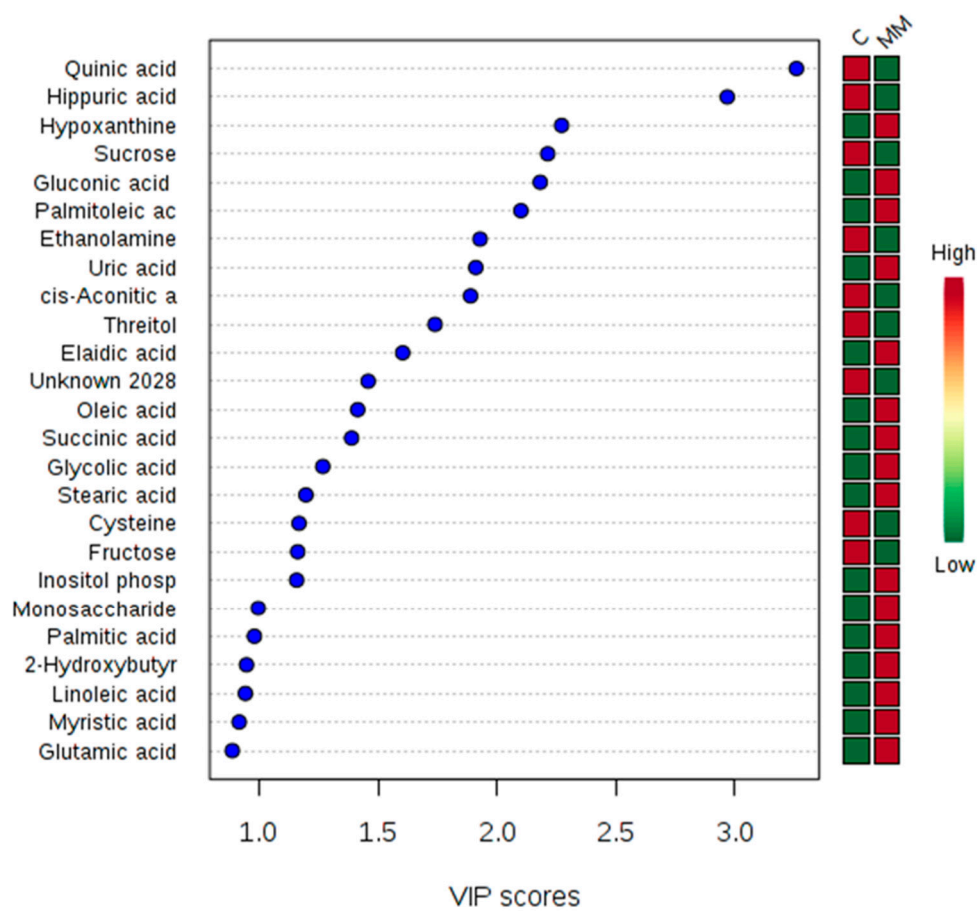

**Figure S3.** PLS-DA VIP score plot of the model obtained from the comparison MM/Controls.

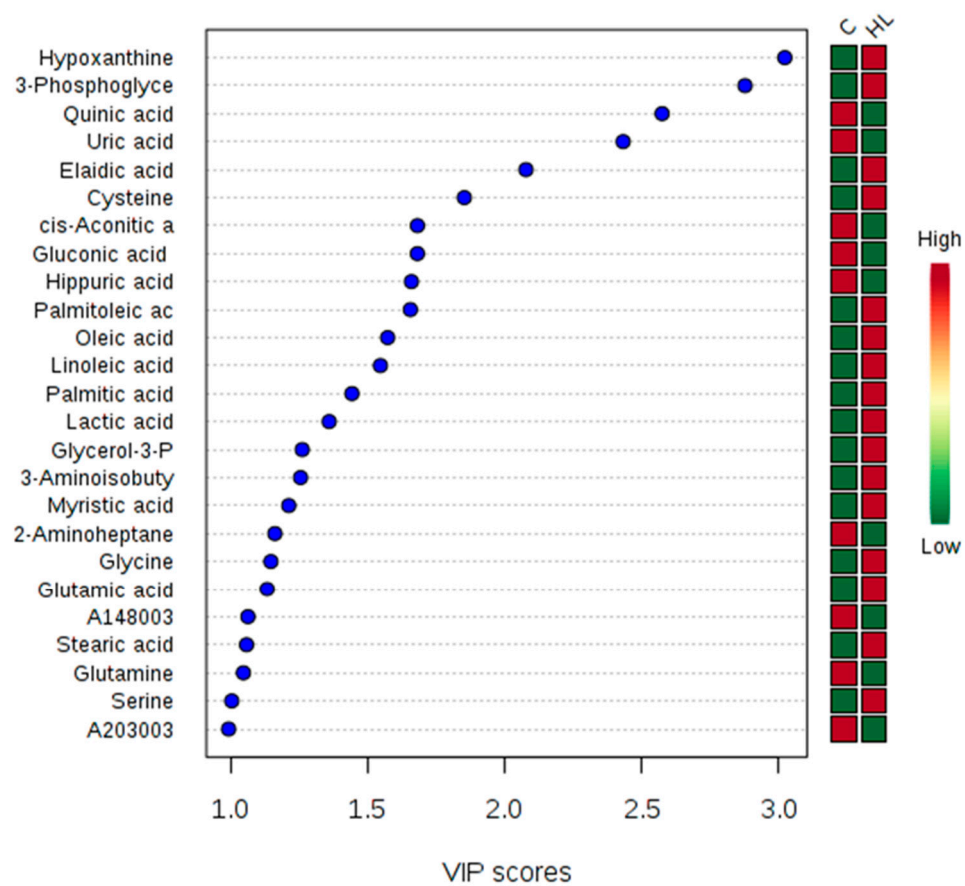

**Figure S4.** PLS-DA VIP score plot of the model obtained from the comparison HL/Controls.
